# Supplementary material for: IMP1 suppresses breast tumor growth and metastasis through the regulation of its target mRNAs
Source: PubMed Central journal article supplement (PMC4941270; doi:10.18632/oncotarget.7464), 2016-02-17
Supplement: oncotarget-07-15690-s001.pdf [file oncotarget-07-15690-s001.pdf]

## IMP1 suppresses breast tumor growth and metastasis through the regulation of its target mRNAs

### Supplementary Materials

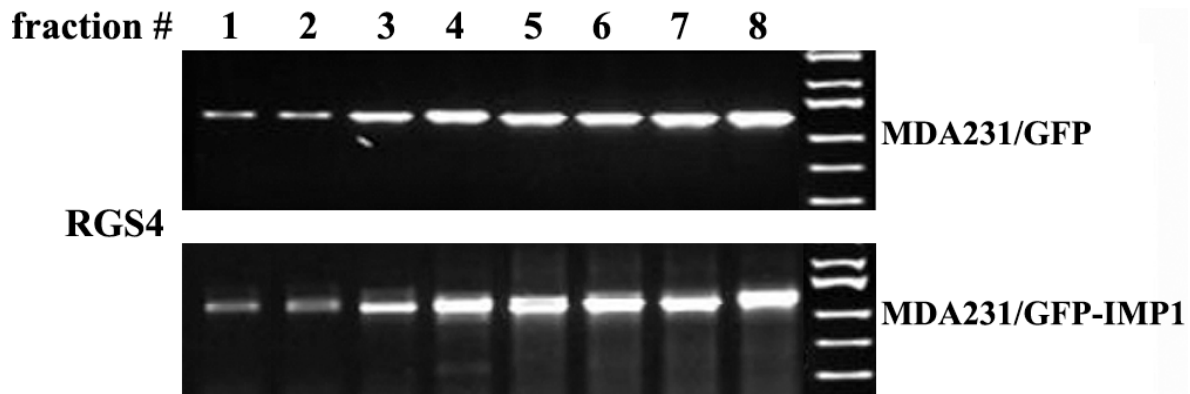

**Supplementary Figure S1:** Total RNAs were isolated from the sucrose fractions. An equal amount of RNA from each fraction was subjected to RT-PCR to detect the polysomal distribution of RGS4 mRNA in the sucrose gradient.

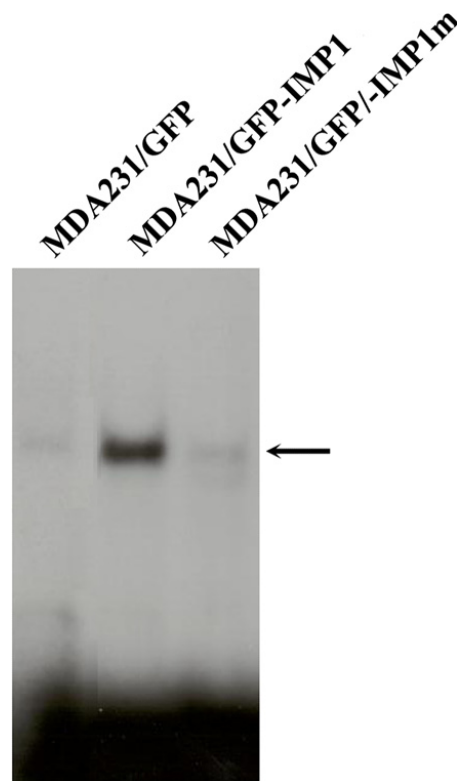

**Supplementary Figure S2:** The 3'UTR of GDF15 binds to IMP1 but not to IMP1m. Aliquots of  $^{32}\text{P}$ -labeled 3' UTR of GDF15 mRNA was incubated with extracts prepared from MDA231/GFP, MDA231/GFP-IMP1 and MDA231/GFP-IMP1m cells. RNA-protein complexes (arrow indicated) were formed in the MDA231/GFP-IMP1 extracts. Cell extracts expressing GFP or GFP-IMP1m did not form complex with the RNA probe.

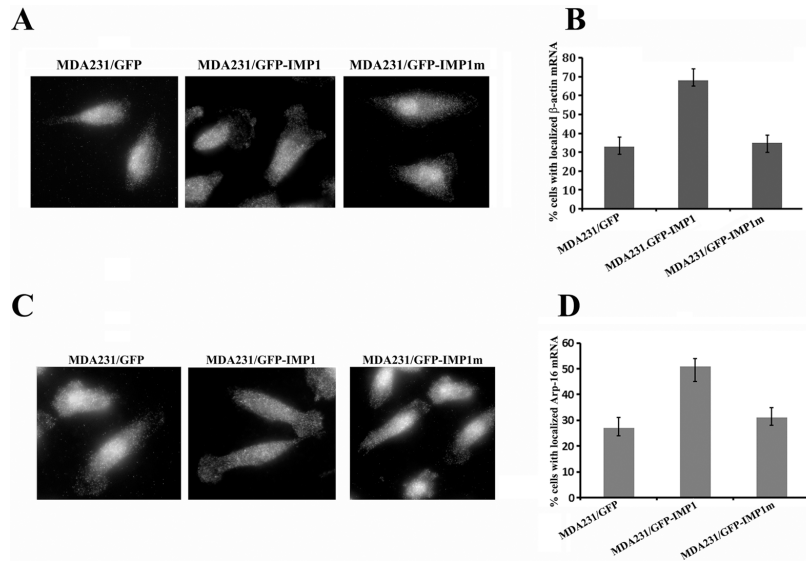

**Supplementary Figure S3: Localization of  $\beta$ -actin and ARP-16 mRNAs in MDA231 cells in responding to IMP1 or IMP1m expression.** *In situ* hybridization was performed on MDA231/GFP, MDA231/GFP-IMP1 and MDA231/GFP-IMP1m cells to detect the localization of  $\beta$ -actin mRNA (A) and (B), and ARP-16 mRNA (C) and (D). ( $n = 100$  cells from each cell clone, from two independent experiments). Error bars indicate  $\pm$  s.e.m.

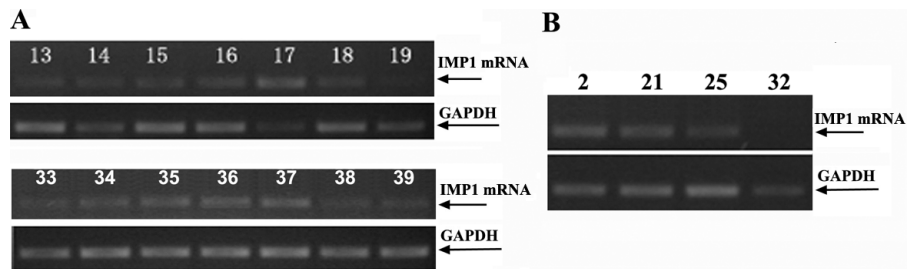

**Supplementary Figure S4: Expression of IMP1 mRNA in human breast tumor and normal tissues.** (A) Representative agarose gels showing the expression of IMP1 mRNA in human breast tumors. (B) Representative agarose gels showing the expression of IMP1 mRNA in normal breast tissues. Tissue samples were obtained from Shantou Tumor Hospital, China. Transcripts of IMP1 were detected by nested RT-PCR. GAPDH mRNA was used as internal controls for the integrity of RNA. Arrows indicate the amplified IMP1 and GAPDH mRNAs.

**Supplementary Table S1: Primers used for RT-PCR**

| Gene    | Forward primers          | Reverse primers         |
|---------|--------------------------|-------------------------|
| AMIGO2  | ATGTAAGTGGATAATGCCACATCC | CAAAGCACAGTACAGTAGGGTC  |
| CAPS1   | AATGGAGGCTGCAGGACTGGC    | AGTCCGGGTGCGGGGATCGG    |
| CDH5    | TACACCTCGTGTTGTACATC     | ATGACGAAGGGTGAGCTTGGTG  |
| CEBPB   | CAAACTTTGGCACTGGGGCAC    | TTGCGTCAGTCCCGTGTACACA  |
| GAPDH   | GAGTCAACGGATTTGGTCGT     | TGGGATTTCCATTGATGACA    |
| GDF15   | GGTGCTCATTCAAAGACCGAC    | ACAGCTGTTTGGGCAGGAATCG  |
| IGF2    | CCAATATGACACCTGGAAGCAG   | ACTTCCGATTGCTGGCCATCTC  |
| IMP1    | CAGCCAGCTGACTTCAGTCACC   | ACGTGCTTTTACATAGCAGTGGC |
| Kiss1   | ACTCACTGGTTTCTTGGCAGC    | ACCTTTTCTAATGGCTCCCCA   |
| PTGS2   | GCCTGAATGTGCCATAAGACTG   | TATTTCAATTTCTCCCTCTTCCC |
| RBP1    | CCATATGATCATCCGCACGCTG   | ACTGCACCTTCTTGAATACTTGC |
| RGS4    | AAGATGTGCAAAGGGCTTGAG    | AGCCCATTTCTTGACTTCCTC   |
| TFPI2   | GTCCCAAGAAGACAAAGTCGCA   | GTGGTCTCCAACCCACAATGTC  |
| TNFAIP2 | CTGACACCATCCAGCACTTCTG   | GACCTCACTGTTGGATAGGTTT  |

Microarray identified transcripts were selected for further validation by real time RT-PCR. Primers listed in the table were used to detect the expression of interested genes in xenograft mice, MDA231 cells and human patients.

**Supplementary Table S2: Genes are up-regulated in xenograft tumors in responding to IMP1 expression**

Microarray identified mRNAs that are up-regulated in the xenograft tumors in responding to IMP1 expression (I/G). Microarray experiments and data analyses ( $P < 0.05$ ) were performed in the Gene Company Limited (GuangZhou, China). Transcripts that were up-regulated in responding to IMP1 expression were shown. I: GFP-IMP1 cell-derived tumors; G: GFP cell-derived tumors.

**Supplementary Table S3: Genes are down-regulated in xenograft tumors in responding to IMP1 expression**

Microarray identified mRNAs that are down-regulated in the xenograft tumors in responding to IMP1 expression (I/G). Microarray experiments and data analyses ( $P < 0.05$ ) were performed in the Gene Company Limited (GuangZhou, China). Transcripts that were down-regulated in responding to IMP1 expression were shown. I: GFP-IMP1 cell-derived tumors; G: GFP cell-derived tumors.

## Supplementary Table S4: Selected microarray-identified transcripts up- or down-regulated in xenograft tumors

### A. Selected mRNAs up-regulated in xenograft tumors

| Gene symbol | Gene bank ID | Scald fold<br>GFP-IMP1/GFP | Biological functions                                               |
|-------------|--------------|----------------------------|--------------------------------------------------------------------|
| ZDHC17      | NM_015336    | 2.0                        | Cellular transport and signal transduction                         |
| ARHGAP11A   | NM_199357    | 2.1                        | GTPase activator, small gtpase mediated signal transduction        |
| MAPK14      | NM_139012    | 2.5                        | Signal transduction and apoptotic process                          |
| TNS1        | NM_022648    | 2.9                        | Fibroblast migration, cell-substrate junction assembly             |
| ARHGAP26    | NM_001135608 | 3.0                        | GTPase activator, actin cytoskeleton organization                  |
| AMIGO2      | NM_001143668 | 3.7                        | Negative regulation of apoptotic process and cell adhesion         |
| TAGLN       | NM_001001522 | 5.1                        | Epithelial cell differentiation, muscle organ development          |
| CDH5        | NM_001795    | 5.4                        | Negative regulation of cell proliferation, cell polarity           |
| GNGT2       | NM_001198756 | 5.5                        | Signal transducer and phototransduction                            |
| RGS4        | NM_001113380 | 5.6                        | Regulation of G-protein coupled receptor protein signaling pathway |
| CD24        | NM_013230    | 7.0                        | Wnt signaling pathway                                              |
| RBP1        | NM_001130992 | 7.0                        | Retinoid metabolic process                                         |
| PTPRN2      | NM_130842    | 7.8                        | Transmembrane receptor protein tyrosine phosphatase                |
| KISS1       | NM_002256    | 10.3                       | Repressing cell proliferation, Regulation of MAPK cascade          |

### B. Selected mRNAs down-regulated in xenograft tumors

| Gene symbol | Gene bank ID | Scald fold<br>GFP-IMP1/GFP | Biological functions                                                  |
|-------------|--------------|----------------------------|-----------------------------------------------------------------------|
| MUC1        | NM_001044390 | 0.46                       | Transcription cofactor, post-translational protein modification       |
| PPP1R3C     | NM_005398    | 0.41                       | Protein serine/threonine phosphatase                                  |
| CDH18       | NM_001167667 | 0.38                       | Calcium ion binding, adherens junction organization                   |
| CEBPB       | NM_005194    | 0.38                       | Cell proliferation, cell differentiation and immune response          |
| GDF15       | NM_004864    | 0.36                       | Cell proliferation, extracellular matrix organization                 |
| ZFP36       | NM_003407    | 0.36                       | RNA metabolic process, AU-rich element binding                        |
| TNFAIP2     | NM_006291    | 0.35                       | Angiogenesis, cell differentiation, exocytosis                        |
| RASD1       | NM_016084    | 0.34                       | Signal transduction and regulation of transcription                   |
| BATF        | NM_006399    | 0.25                       | Cell differentiation, cytokine production, transcription              |
| TFPI2       | NM_006528    | 0.17                       | Extracellular matrix constituent, serine-type endopeptidase inhibitor |
| CEBPD       | NM_005195    | 0.15                       | Sequence-specific DNA binding                                         |
| CASP1       | NM_033295    | 0.15                       | Signal transduction, innate immune response                           |
| GPR64       | NM_001079858 | 0.07                       | G-protein coupled receptor activity                                   |
| RAP1A)      | NM_002884    | 0.03                       | Ras GTPase binding, regulation of insulin secretion                   |
| PTGS2       | NM_000963    | 0.03                       | Peroxidase activity and protein homodimerization activity             |

Selected microarray identified mRNAs that are up- or down-regulated in the xenograft tumors (IMP1+/IMP1-). Two categories of transcripts important for tumorigenesis and metastasis were selected from the microarray results. One category of mRNAs contained transcripts that were up-regulated in the presence of IMP1 (A). The second category included those down-regulated mRNAs in IMP1-expressing tumors (B).
